# Supplementary material
Source: PubMed Central journal article supplement (PMC7969142)
Supplement: mmc1.pdf [file mmc1.pdf]

# THE LANCET

## Supplementary appendix

This appendix formed part of the original submission. We post it as supplied by the authors.

Supplement to: Krieger N, Waterman PD, Chen JT, Testa C, Hanage WP. Missing again: US racial and ethnic data for COVID-19 vaccination. *Lancet* 2021; published online March 17. [http://dx.doi.org/10.1016/S0140-6736\(21\)00465-7](http://dx.doi.org/10.1016/S0140-6736(21)00465-7).

**Missing again: US racial and ethnic data for COVID-19 vaccination**

\*Nancy Krieger, Pamela D Waterman, Jarvis T Chen, Christian Testa, William P Hanage  
nkrieger@hsph.harvard.edu

## Immunization Information System Data Requirement Form

COVID-19 Vaccine Administration



---

This form can be used in the rare instances when you are unable to access your jurisdiction's IIS due to technical issues or lack of internet access. When possible, information should always be captured electronically to avoid the least number of possible mistakes when transcribing.

However, this form may be printed to capture information manually. Vaccination providers are required to report vaccination administration information within 72 hours of administration. This information should be entered as soon you are able to access your jurisdiction's IIS or VAMS.

### Recipient Information

ID \_\_\_\_\_

First Name \_\_\_\_\_

Middle Name (optional) \_\_\_\_\_

Last Name \_\_\_\_\_

Date of Birth \_\_\_\_\_

Sex      Male                  Female                  Unknown

Primary insurance holder \_\_\_\_\_

Group/Individual ID number \_\_\_\_\_

### Insurance Information (Optional)

Insurer \_\_\_\_\_

### Address

Street 1 \_\_\_\_\_

Street 2 \_\_\_\_\_

City \_\_\_\_\_

County \_\_\_\_\_

State \_\_\_\_\_

Zip Code \_\_\_\_\_

### Race (select all that apply)

|                          |                                     |                          |                  |
|--------------------------|-------------------------------------|--------------------------|------------------|
| <input type="checkbox"/> | American Indian/Alaskan Native      | <input type="checkbox"/> | White            |
| <input type="checkbox"/> | Asian                               | <input type="checkbox"/> | Other Race       |
| <input type="checkbox"/> | Native Hawaiian or Pacific Islander | <input type="checkbox"/> | Unknown          |
| <input type="checkbox"/> | Black/African American              | <input type="checkbox"/> | Unable to report |

### Ethnicity (select all that apply)

|                          |                        |
|--------------------------|------------------------|
| <input type="checkbox"/> | Hispanic or Latino     |
| <input type="checkbox"/> | Not Hispanic or Latino |
| <input type="checkbox"/> | Unknown                |
| <input type="checkbox"/> | Unable to report       |

### Vaccine Information

| Type | Product | Date Administered | Manufacturer | Lot Number | Expiration Date<br><small>mmddyyyy</small> | # Wasted |
|------|---------|-------------------|--------------|------------|--------------------------------------------|----------|
|      |         |                   |              |            |                                            |          |

|                            |      |       |                             |  |  |
|----------------------------|------|-------|-----------------------------|--|--|
| <b>Administration Site</b> |      |       | <b>Administration Route</b> |  |  |
| LA (Left arm)              |      |       |                             |  |  |
| RA (Left arm)              |      |       | C28161 (Intramuscular)      |  |  |
| LE (lower extremity)       | Left | Right |                             |  |  |

|                    |  |                           |     |                    |     |
|--------------------|--|---------------------------|-----|--------------------|-----|
| <b>Dose Number</b> |  | <b>Missed Appointment</b> | Y/N | <b>Comorbidity</b> | Y/N |
|--------------------|--|---------------------------|-----|--------------------|-----|

|                            |     |                       |  |
|----------------------------|-----|-----------------------|--|
| <b>Refused Vaccination</b> | Y/N | <b>If Yes, Reason</b> |  |
|----------------------------|-----|-----------------------|--|

|                   |  |                                               |     |
|-------------------|--|-----------------------------------------------|-----|
| <b>Vaccinator</b> |  | <b>Received EUA Fact Sheet for Recipients</b> | Y/N |
|-------------------|--|-----------------------------------------------|-----|

12/11/20 CS321629-C
1

**Figure 1.** US Centers for Disease Control and Prevention. Immunization Information System Data Requirement Form. COVID-19 Vaccine Administration. 12/11/20. CS321629-C.  
<https://www.cdc.gov/vaccines/covid-19/reporting/downloads/IIS-data-requirement-form.pdf> ;  
accessed February 4, 2021.
